# Supplementary material for: Species sorting shapes the divergence of a traditional fermented dairy-derived bacterial community with repeatable functionality during propagation with alternative substrates
Source: Research Square preprint supplement (doi:10.21203/rs.3.rs-7764648/v1), 2025-10-19
Supplement: Supplementary file 9 [file e45353217c73fd9bf0a23503.docx]

**Table S7** Assessment of pH variation by propagation phase following repeated transfer of mabisi microbial communities in varied substrates over time. The statistical analysis was conducted using the Wilcoxon rank sum test

| **Propagation phase** | **W statistic** | ***p*-value** |
| --- | --- | --- |
| Test: Wilcoxon rank sum test | 15774 | 1.397e-05* |

**Note:** ‘*’ represents statistical significance, and no esthetics represent a non-statistically significant result.
